# Supplementary material for: A spatio-temporal individual-based network framework for West Nile virus in the USA: Spreading pattern of West Nile virus
Source: PubMed Central journal article supplement (PMC6433293; doi:10.1371/journal.pcbi.1006875), 2019-03-13
Supplement: pcbi.1006875.s002.pdf [file pcbi.1006875.s002.pdf]

# Approximate Bayesian Computation based on sequential Monte Carlo sampling (ABC-SMC) method

This research has used ABC-SMC methods to estimate parameters and to select best kernel network model among three distance dispersal kernels.

## Parameter estimation

The steps for approximate Bayesian computation with sequential Monte Carlo sampling (ABC-SMC) algorithm for parameter estimation are [1-6]:

- Step 1 Initialize tolerance  $\epsilon$  for each SMC round, where  $\epsilon_P < \dots < \epsilon_2 < \epsilon_1$ . Set Population indicator,  $p=1$ .
- Step 2 Particle indicator,  $n=1$ .
- Step 3 Generate a particle (set of parameters),  $\theta_p^n$
- (a). if  $p=1$ , sample from prior of parameters,  $\pi(\theta)$ ;
  - (b). if  $p>1$ , sample the particle from previous population  $\{\theta_{p-1}^n\}$  with weights  $W_{p-1}$  and then perturb the particle,  $\theta'$  by using perturbation kernel,  $PK_p$  to get  $\theta''$ .
  - (c). if  $\pi(\theta'') = 0$ , return to Step 3.
- Step 4 Run the model  $R$  times with the new particle and compare the simulated weekly human WNV incidence with observed weekly WNV incidence using the goodness-of-fit metric, We calculated  $r_p(\theta'') = (1/R) * \sum_{r=1}^R 1(\text{dist}(x, d) < \epsilon_p)$ , if  $r_p(\theta'') = 0$  reject the particle; go back to Step 3(a).
- Step 5 Calculate the weight for the accepted particle,
- (a). if  $p=1$ ,  $W_{n,p} = r_p(\theta'')$ ;
  - (b). if  $p>1$ , the weight is given by,  $W_{n,p} = \frac{\pi(\theta_p^i) * r_p(\theta'')}{\sum_{j=1}^N W_{i,p-1} PK_p(\theta_{p-1}^j, \theta_p^i)}$ .
- Step 6 Repeat steps 3 - 5 until  $N= 1000$  particles have been accepted.
- Step 7 Normalize the weights. If  $p < P$ , set  $p= p+1$ , go to Step 2.

## Model selection

The steps for approximate Bayesian computation with sequential Monte Carlo sampling (ABC-SMC) algorithm for model selection are [1-6]:

- Step 1 Initialize tolerance for each SMC round  $\epsilon_P < \dots < \epsilon_2 < \epsilon_1$ . Set Population indicator,  $p=1$ .
- Step 2 Particle indicator,  $n=1$ .

Step 3 Generate a particle

- (a). if  $p=1$ , sample model parameter  $m$  and parameters for that model from prior,  $\pi(m, \theta)$ ;
- (b). if  $p>1$ , sample model  $m'$  with probability  $Pr_{t-1}(m')$  and then perturb by perturbation kernel  $PKm_p$ , sample the particle from previous population  $\{\theta(m'')_{p-1}\}$  with weights  $W_{p-1}$  and then perturb the particle  $\theta'$  by using perturbation kernel to get  $\theta''$ .
- (c). if  $\pi(m'', \theta'') = 0$ , return to Step 3.

Step 4 Run the model  $m''$ ,  $R$  times with the new particle and compare the simulated weekly human WNV incidence with observed weekly WNV incidence using the goodness-of-fit metric, We calculated

$$r_p(\theta'') = (1/R) * \sum_{r=1}^R 1(\text{dist}(x, d) < \epsilon_p), \text{ if } r_p(\theta'') = 0 \text{ reject the particle; go back to Step 3.}$$

Step 5 Calculate weight for the accepted particle, set  $(m_p^n, \theta_p^n) = (m'', \theta'')$ ,

- (a). if  $p=1$ ,  $W_{n,p}(m_p^n, \theta_p^n) = (1/R) * \sum_{r=1}^R 1(\text{dist}(x, d) < \epsilon_p)$ ; Here  $R$  is the number of replicate simulation run for a fixed particle.
- (b). if  $p>1$ , the weight is given by,

$$W_{n,p}(m_p^n, \theta_p^n) = \frac{\pi(m_p^n, \theta_p^n) * (1/R) * \sum_{r=1}^R 1(\text{dist}(x, d) < \epsilon_p)}{\sum_{j=1}^N W_{i,p-1} PK_p(\theta_{p-1}^j, \theta_p^i)}.$$

Step 6 Repeat steps 3 - 5 until  $N= 1000$  particles have been accepted.

Step 7 Normalize the weights for every  $m$ . If  $p < P$ , set  $p= p+1$ , go to Step 3.

## References

1. Toni T, Welch D, Strelkowa N, Ipsen A, Stumpf MP. Approximate Bayesian computation scheme for parameter inference and model selection in dynamical systems. *Journal of the Royal Society Interface*. 2009;6(31):187–202.
2. Csilléry K, Blum MG, Gaggiotti OE, François O. Approximate Bayesian computation (ABC) in practice. *Trends in ecology & evolution*. 2010;25(7):410–418.
3. Beaumont MA. Approximate Bayesian computation in evolution and ecology. *Annual review of ecology, evolution, and systematics*. 2010;41:379–406.
4. Sunnåker M, Busetto AG, Numminen E, Corander J, Foll M, Dessimoz C. Approximate bayesian computation. *PLoS computational biology*. 2013;9(1):e1002803.
5. Del Moral P, Doucet A, Jasra A. Sequential monte carlo samplers. *Journal of the Royal Statistical Society: Series B (Statistical Methodology)*. 2006;68(3):411–436.
6. Sisson SA, Fan Y, Tanaka MM. Sequential monte carlo without likelihoods. *Proceedings of the National Academy of Sciences*. 2007;104(6):1760–1765.
