# Supplementary material for: A spatio-temporal individual-based network framework for West Nile virus in the USA: Spreading pattern of West Nile virus
Source: PubMed Central journal article supplement (PMC6433293; doi:10.1371/journal.pcbi.1006875), 2019-03-13
Supplement: pcbi.1006875.s003.pdf [file pcbi.1006875.s003.pdf]

## Network Description

**Table A.** Description of sub-networks for 2014.  $|V| = 9373$  and scaling constant  $S_c = 0.03$  for 2014

| Sub-network Id | Location | Nodes (% of $ V $ ) | Probability of Active nodes |        |        |        |        |
|----------------|----------|---------------------|-----------------------------|--------|--------|--------|--------|
|                |          |                     | Jun.                        | Jul.   | Aug.   | Sept.  | Oct.   |
| SN1            | AL       | 0.4588 %            | 0.4651                      | 0.4884 | 0.4186 | 0.9767 | 1.0000 |
| SN2            | AZ       | 0.5334 %            | 1.0000                      | 0.7600 | 0.4600 | 0.5200 | 0.5800 |
| SN3            | AR       | 0.3521 %            | 0.6970                      | 1.0000 | 0.8182 | 0.6061 | 1.0000 |
| SN4            | CA       | 5.4732 %            | 0.6121                      | 0.3996 | 0.3801 | 0.5166 | 1.0000 |
| SN5            | CO       | 2.2298 %            | 1.0000                      | 1.0000 | 0.9139 | 1.0000 | 1.0000 |
| SN6            | CT       | 2.2511 %            | 1.0000                      | 0.9716 | 0.7109 | 0.7630 | 1.0000 |
| SN7            | DE       | 1.4510 %            | 0.2868                      | 0.3529 | 0.6397 | 1.0000 | 1.0000 |
| SN8            | DC       | 1.6964 %            | 0.2013                      | 0.2830 | 0.6289 | 1.0000 | 0.8742 |
| SN9            | FL       | 0.1174 %            | 0.5455                      | 0.4545 | 0.6364 | 0.6364 | 1.0000 |
| SN10           | GA       | 1.6003 %            | 0.5867                      | 0.6600 | 0.5067 | 0.8400 | 1.0000 |
| SN11           | ID       | 0.6401 %            | 1.0000                      | 1.0000 | 0.5333 | 1.0000 | 1.0000 |
| SN12           | IL       | 8.5778 %            | 0.7923                      | 0.7923 | 0.8022 | 1.0000 | 1.0000 |
| SN13           | IN       | 1.7177 %            | 1.0000                      | 0.9503 | 0.6584 | 0.9814 | 1.0000 |
| SN14           | IA       | 0.8855 %            | 0.8554                      | 1.0000 | 0.7108 | 0.8313 | 1.0000 |
| SN15           | KS       | 1.2696 %            | 0.5378                      | 0.7311 | 0.5882 | 1.0000 | 1.0000 |
| SN16           | KY       | 1.0135 %            | 0.9263                      | 0.7158 | 0.8947 | 1.0000 | 1.0000 |
| SN17           | LA       | 0.2454 %            | 0.4783                      | 0.4348 | 0.4348 | 0.5217 | 1.0000 |
| SN18           | ME       | 0.8322 %            | 1.0000                      | 1.0000 | 0.5256 | 0.7308 | 1.0000 |
| SN19           | MD       | 3.3180 %            | 0.7878                      | 0.8103 | 0.8842 | 1.0000 | 1.0000 |
| SN20           | MA       | 4.6623 %            | 0.8558                      | 1.0000 | 0.9085 | 1.0000 | 1.0000 |
| SN21           | MI       | 4.0435 %            | 1.0000                      | 0.9367 | 0.9604 | 1.0000 | 1.0000 |
| SN22           | MN       | 1.4403 %            | 1.0000                      | 0.8296 | 0.6148 | 1.0000 | 1.0000 |
| SN23           | MS       | 0.1814 %            | 0.8235                      | 0.5882 | 0.5882 | 0.6471 | 1.0000 |
| SN24           | MO       | 2.5605 %            | 0.5458                      | 0.5417 | 0.4958 | 1.0000 | 1.0000 |
| SN25           | MT       | 1.3016 %            | 1.0000                      | 1.0000 | 0.7131 | 0.6475 | 0.3689 |
| SN26           | NE       | 0.9175 %            | 1.0000                      | 0.8837 | 0.6512 | 0.8488 | 1.0000 |
| SN27           | NV       | 0.3201 %            | 0.9667                      | 0.7667 | 0.8000 | 1.0000 | 1.0000 |
| SN28           | NH       | 0.6828 %            | 1.0000                      | 1.0000 | 0.6875 | 1.0000 | 1.0000 |
| SN29           | NJ       | 4.0435 %            | 0.6544                      | 0.6781 | 0.7018 | 1.0000 | 1.0000 |
| SN30           | NM       | 0.5975 %            | 0.8036                      | 0.6429 | 0.7857 | 1.0000 | 1.0000 |
| SN31           | NY       | 7.8843 %            | 0.8917                      | 0.9107 | 1.0000 | 1.0000 | 1.0000 |
| SN32           | NC       | 1.4830 %            | 0.8633                      | 0.7050 | 0.6835 | 1.0000 | 1.0000 |
| SN33           | ND       | 0.3627 %            | 1.0000                      | 0.7647 | 1.0000 | 1.0000 | 1.0000 |
| SN34           | OH       | 4.4063 %            | 0.9637                      | 1.0000 | 0.9274 | 1.0000 | 1.0000 |
| SN35           | OK       | 1.3016 %            | 0.2295                      | 0.3033 | 0.3361 | 0.4098 | 1.0000 |
| SN36           | OR       | 2.0911 %            | 1.0000                      | 1.0000 | 0.7041 | 1.0000 | 1.0000 |
| SN37           | PA       | 5.9853 %            | 0.8824                      | 0.9037 | 1.0000 | 1.0000 | 1.0000 |
| SN38           | RI       | 0.4801 %            | 0.8000                      | 1.0000 | 0.6444 | 0.8667 | 1.0000 |
| SN39           | SC       | 0.5334 %            | 0.4600                      | 0.4600 | 0.5000 | 0.6600 | 1.0000 |
| SN40           | SD       | 0.4481 %            | 0.9762                      | 1.0000 | 0.7619 | 0.9286 | 1.0000 |
| SN41           | TN       | 1.4403 %            | 0.6296                      | 0.9259 | 0.8000 | 1.0000 | 1.0000 |

**Table A.** Description of sub-networks for 2014.  $|V| = 9373$  and scaling constant  $S_c = 0.03$  for 2014

| Sub-network Id | Location | Nodes (% of $ V $ ) | Probability of Active nodes |        |        |        |        |
|----------------|----------|---------------------|-----------------------------|--------|--------|--------|--------|
| SN42           | TX       | 1.6003 %            | 0.2333                      | 0.3800 | 0.5333 | 0.6533 | 1.0000 |
| SN43           | UT       | 1.2056 %            | 1.0000                      | 0.7345 | 0.3894 | 0.5044 | 0.8142 |
| SN44           | VT       | 0.8322 %            | 1.0000                      | 1.0000 | 0.7436 | 0.8462 | 1.0000 |
| SN45           | VA       | 5.3558 %            | 0.3665                      | 0.3546 | 0.5936 | 1.0000 | 1.0000 |
| SN46           | WA       | 3.8622 %            | 1.0000                      | 1.0000 | 0.5884 | 1.0000 | 1.0000 |
| SN47           | WV       | 0.5868 %            | 1.0000                      | 0.8000 | 0.4727 | 0.5455 | 1.0000 |
| SN48           | WI       | 4.2462 %            | 1.0000                      | 0.7236 | 0.5829 | 0.9020 | 1.0000 |
| SN49           | WY       | 0.4801 %            | 1.0000                      | 1.0000 | 0.8000 | 0.7778 | 0.3111 |

**Table B.** Description of sub-networks for 2015.  $|V| = 7657$  and scaling constant  $S_c = 0.02$  for 2015

| Sub-network Id | Location | Nodes (% of $ V $ ) | Probability of Active nodes |        |        |        |        |
|----------------|----------|---------------------|-----------------------------|--------|--------|--------|--------|
|                |          |                     | Jun.                        | Jul.   | Aug.   | Sept.  | Oct.   |
| SN1            | AL       | 0.2612%             | 1.000                       | 0.9000 | 0.9000 | 0.9956 | 1.000  |
| SN2            | AZ       | 0.6138%             | 1.000                       | 0.9149 | 0.6595 | 0.7021 | 0.5106 |
| SN3            | AR       | 0.4832%             | 0.9730                      | 0.6757 | 1.000  | 0.7027 | 1.000  |
| SN4            | CA       | 3.1213%             | 1.000                       | 0.6192 | 0.6443 | 0.6066 | 1.000  |
| SN5            | CO       | 3.3172%             | 1.000                       | 0.6181 | 0.4645 | 0.9094 | 0.7834 |
| SN6            | CT       | 2.1027%             | 1.000                       | 0.8695 | 0.6894 | 0.6894 | 1.000  |
| SN7            | DE       | 0.8620%             | 1                           | 0.6969 | 0.9242 | 1.0000 | 1.000  |
| SN8            | DC       | 0.7183%             | 0.5636                      | 0.5636 | 1.0000 | 0.9989 | 1.000  |
| SN9            | FL       | 0.1437%             | 0.9091                      | 1.0000 | 1.0000 | 0.9911 | 1.000  |
| SN10           | GA       | 1.0317%             | 1.0000                      | 0.8101 | 0.7848 | 0.8354 | 1.000  |
| SN11           | ID       | 1.2146%             | 1.0000                      | 0.7204 | 0.6344 | 1.0000 | 0.6666 |
| SN12           | IL       | 6.6083%             | 1.0000                      | 0.7608 | 0.8023 | 1.0000 | 1.000  |
| SN13           | IN       | 1.3974%             | 1.0000                      | 0.9345 | 0.8317 | 1.0000 | 1.000  |
| SN14           | IA       | 0.8880%             | 1.0000                      | 0.6764 | 0.7794 | 1.0000 | 1.000  |
| SN15           | KS       | 0.9011%             | 1.0000                      | 0.5942 | 0.8260 | 1.0000 | 1.000  |
| SN16           | KY       | 1.0709%             | 0.7073                      | 0.7682 | 1.0000 | 1.0000 | 1.000  |
| SN17           | LA       | 0.2742%             | 0.6190                      | 0.7619 | 1.0000 | 0.9978 | 1.000  |
| SN18           | ME       | 1.0709%             | 1.0000                      | 0.8414 | 0.5609 | 0.4878 | 1.000  |
| SN19           | MD       | 3.3433%             | 0.6914                      | 0.5898 | 1.0000 | 0.8906 | 1.000  |
| SN20           | MA       | 3.9963%             | 0.7778                      | 0.8725 | 1.0000 | 1.0000 | 1.000  |
| SN21           | MI       | 4.3620%             | 1.0000                      | 0.8353 | 0.6946 | 1.0000 | 1.000  |
| SN22           | MN       | 1.3974%             | 1.0000                      | 0.7196 | 0.9065 | 0.9111 | 1.000  |
| SN23           | MS       | 1.7239%             | 1.0000                      | 0.8461 | 0.9230 | 0.9876 | 1.000  |
| SN24           | MO       | 1.7239%             | 0.9697                      | 0.8181 | 1.0000 | 0.9976 | 1.000  |
| SN25           | MT       | 2.8862%             | 1.0000                      | 0.4117 | 0.7013 | 0.7058 | 0.1719 |
| SN26           | NE       | 0.8358%             | 1.0000                      | 0.8437 | 0.6718 | 1.0000 | 1.000  |
| SN27           | NV       | 0.3917%             | 1.0000                      | 0.6333 | 0.6000 | 0.7333 | 1.0000 |
| SN28           | NH       | 0.6007%             | 1.0000                      | 0.9130 | 0.6956 | 0.9876 | 1.0000 |
| SN29           | NJ       | 4.4142%             | 0.5769                      | 0.5118 | 1.0000 | 0.9977 | 1.0000 |
| SN30           | NM       | 0.6007%             | 1.0000                      | 0.6739 | 0.8043 | 0.9767 | 1.0000 |
| SN31           | NY       | 7.9404%             | 0.8125                      | 0.7960 | 1.0000 | 0.9876 | 1.0000 |

**Table B.** Description of sub-networks for 2015.  $|V| = 7657$  and scaling constant  $S_c = 0.02$  for 2015

| Sub-network Id | Location | Nodes (% of $ V $ ) | Probability of Active nodes |        |        |        |        |
|----------------|----------|---------------------|-----------------------------|--------|--------|--------|--------|
|                |          |                     |                             |        |        |        |        |
| SN32           | NC       | 1.3582%             | 1.0000                      | 0.7788 | 0.7692 | 0.9879 | 1.0000 |
| SN33           | ND       | 0.7444%             | 1.0000                      | 0.5087 | 0.9473 | 0.9871 | 0.6491 |
| SN34           | OH       | 4.3750%             | 1.000                       | 0.8328 | 0.8746 | 0.9899 | 1.0000 |
| SN35           | OK       | 0.5093%             | 0.7949                      | 1.0000 | 0.8461 | 0.8974 | 1.0000 |
| SN36           | OR       | 2.9776%             | 1.0000                      | 0.6403 | 0.4210 | 0.9342 | 1.0000 |
| SN37           | PA       | 10.1475%            | 0.5534                      | 0.9317 | 1.0000 | 0.7657 | 1.0000 |
| SN38           | RI       | 0.5876%             | 0.9556                      | 1.0000 | 0.9333 | 0.9777 | 1.0000 |
| SN39           | SC       | 0.3395%             | 0.730                       | 0.7692 | 1.0000 | 1.0000 | 1.0000 |
| SN40           | SD       | 0.6921%             | 1.0000                      | 0.6226 | 0.3962 | 0.8113 | 1.0000 |
| SN41           | TN       | 1.0317%             | 0.9873                      | 0.9240 | 1.0000 | 1.0000 | 1.0000 |
| SN42           | TX       | 1.1884%             | 0.3846                      | 0.4835 | 1.0000 | 1.0000 | 1.0000 |
| SN43           | UT       | 1.319054%           | 1.0000                      | 0.5049 | 0.3366 | 0.5148 | 0.5049 |
| SN44           | VT       | 1.0709%             | 1.0000                      | 0.7804 | 0.5365 | 0.6219 | 1.0000 |
| SN45           | VA       | 2.6119%             | 0.7550                      | 0.6600 | 1.0000 | 0.9950 | 1.0000 |
| SN46           | WA       | 4.2575%             | 1.0000                      | 0.6809 | 0.5920 | 0.9190 | 1.0000 |
| SN47           | WV       | 0.5876%             | 1.0000                      | 0.8666 | 0.6444 | 0.4444 | 1.0000 |
| SN48           | WI       | 6.6475%             | 1.0000                      | 0.6620 | 0.4027 | 0.6149 | 0.6699 |
| SN49           | WY       | 0.8097%             | 1.0000                      | 0.5967 | 0.8064 | 0.5483 | 0.2580 |

**Table C.** Description of sub-networks for 2016.  $|V| = 7430$  and scaling constant  $S_c = 0.015$  for 2016

| Sub-network Id | Location | Nodes (% of $ V $ ) | Probability of Active nodes |        |        |        |        |
|----------------|----------|---------------------|-----------------------------|--------|--------|--------|--------|
|                |          |                     | Jun.                        | Jul.   | Aug.   | Sept.  | Oct.   |
| SN1            | AL       | 0.6999 %            | 0.3654                      | 0.2885 | 0.4423 | 0.5962 | 1.0000 |
| SN2            | AZ       | 0.5922 %            | 1.0000                      | 0.6364 | 0.4545 | 0.3409 | 1.0000 |
| SN3            | AR       | 1.2113 %            | 0.2778                      | 0.1556 | 0.1556 | 0.2111 | 1.0000 |
| SN4            | CA       | 2.7052 %            | 1.0000                      | 0.6667 | 0.5423 | 0.5721 | 0.7363 |
| SN5            | CO       | 3.3513 %            | 1.0000                      | 0.5783 | 0.4257 | 0.9036 | 1.0000 |
| SN6            | CT       | 1.8708 %            | 1.0000                      | 0.6835 | 0.5108 | 0.6259 | 1.0000 |
| SN7            | DE       | 1.3324 %            | 0.2828                      | 0.2828 | 0.3333 | 1.0000 | 1.0000 |
| SN8            | DC       | 0.6999 %            | 0.5000                      | 0.4423 | 0.8077 | 1.0000 | 1.0000 |
| SN9            | FL       | 0.7402 %            | 0.0909                      | 0.0909 | 0.0909 | 0.0909 | 1.0000 |
| SN10           | GA       | 1.5882 %            | 0.3898                      | 0.3559 | 0.3305 | 0.4576 | 1.0000 |
| SN11           | ID       | 0.6864 %            | 1.0000                      | 1.0000 | 0.4902 | 1.0000 | 1.0000 |
| SN12           | IL       | 8.1157 %            | 0.6683                      | 0.5605 | 0.5423 | 1.0000 | 1.0000 |
| SN13           | IN       | 1.8708 %            | 0.8561                      | 0.6547 | 0.5324 | 1.0000 | 1.0000 |
| SN14           | IA       | 0.8210 %            | 1.0000                      | 0.8033 | 0.5738 | 0.9016 | 1.0000 |
| SN15           | KS       | 0.9421 %            | 0.7000                      | 0.4429 | 0.4714 | 1.0000 | 1.0000 |
| SN16           | KY       | 1.1440 %            | 0.5647                      | 0.5647 | 0.5765 | 1.0000 | 1.0000 |
| SN17           | LA       | 0.2153 %            | 0.5000                      | 0.4375 | 0.5000 | 0.6250 | 1.0000 |
| SN18           | ME       | 0.7672 %            | 1.0000                      | 1.0000 | 0.4561 | 0.6842 | 1.0000 |
| SN19           | MD       | 2.9206 %            | 0.7512                      | 0.6083 | 0.6221 | 1.0000 | 1.0000 |
| SN20           | MA       | 4.8991 %            | 0.7555                      | 0.6978 | 0.6951 | 1.0000 | 1.0000 |
| SN21           | MI       | 3.9435 %            | 1.0000                      | 0.7782 | 0.8055 | 1.0000 | 1.0000 |

**Table C.** Description of sub-networks for 2016.  $|V| = 7430$  and scaling constant  $S_c = 0.015$  for 2016

| Sub-network Id | Location | Nodes (% of $ V $ ) | Probability of Active nodes |        |        |        |        |
|----------------|----------|---------------------|-----------------------------|--------|--------|--------|--------|
| SN22           | MN       | 1.8170 %            | 1.0000                      | 0.5630 | 0.4444 | 1.0000 | 1.0000 |
| SN23           | MS       | 0.1750 %            | 0.4615                      | 0.5385 | 0.5385 | 0.6923 | 1.0000 |
| SN24           | MO       | 2.1803 %            | 0.5741                      | 0.4691 | 0.5185 | 1.0000 | 1.0000 |
| SN25           | MT       | 1.3190 %            | 1.0000                      | 1.0000 | 0.8571 | 1.0000 | 0.6633 |
| SN26           | NE       | 0.8479 %            | 1.0000                      | 0.4762 | 0.5079 | 0.8730 | 1.0000 |
| SN27           | NV       | 0.3634 %            | 1.0000                      | 0.5926 | 0.3333 | 0.4074 | 0.8148 |
| SN28           | NH       | 0.5518 %            | 1.0000                      | 1.0000 | 0.5854 | 1.0000 | 1.0000 |
| SN29           | NJ       | 3.9973 %            | 0.6801                      | 0.4276 | 0.4377 | 1.0000 | 1.0000 |
| SN30           | NM       | 0.4980 %            | 1.0000                      | 0.8108 | 0.6486 | 0.7838 | 1.0000 |
| SN31           | NY       | 6.6891 %            | 0.9819                      | 0.8692 | 1.0000 | 1.0000 | 1.0000 |
| SN32           | NC       | 1.5612 %            | 0.5776                      | 0.4741 | 0.4828 | 1.0000 | 1.0000 |
| SN33           | ND       | 0.6326 %            | 1.0000                      | 0.5745 | 0.8723 | 1.0000 | 1.0000 |
| SN34           | OH       | 4.4145 %            | 0.9787                      | 0.8780 | 0.7713 | 1.0000 | 1.0000 |
| SN35           | OK       | 1.3728 %            | 0.2647                      | 0.2549 | 0.3039 | 0.4510 | 1.0000 |
| SN36           | OR       | 2.0054 %            | 1.0000                      | 1.0000 | 0.5101 | 0.8322 | 1.0000 |
| SN37           | PA       | 8.7079 %            | 0.6955                      | 0.5363 | 0.6584 | 1.0000 | 1.0000 |
| SN38           | RI       | 0.5787 %            | 1.0000                      | 0.8372 | 0.4419 | 0.5581 | 0.9070 |
| SN39           | SC       | 0.5653 %            | 0.3333                      | 0.2857 | 0.2619 | 0.4286 | 1.0000 |
| SN40           | SD       | 0.6191 %            | 1.0000                      | 0.4348 | 0.3913 | 0.6304 | 1.0000 |
| SN41           | TN       | 3.3647 %            | 0.2680                      | 0.2400 | 0.2920 | 0.4520 | 1.0000 |
| SN42           | TX       | 1.9246 %            | 0.1958                      | 0.2587 | 0.3986 | 0.3846 | 1.0000 |
| SN43           | UT       | 1.0902 %            | 1.0000                      | 0.6173 | 0.3704 | 0.5556 | 0.7654 |
| SN44           | VT       | 0.7268 %            | 1.0000                      | 1.0000 | 0.6667 | 0.8148 | 1.0000 |
| SN45           | VA       | 2.7322 %            | 1.0000                      | 0.6059 | 0.6158 | 0.8325 | 1.0000 |
| SN46           | WA       | 1.9112 %            | 1.0000                      | 1.0000 | 1.0000 | 1.0000 | 1.0000 |
| SN47           | WV       | 0.5653 %            | 1.0000                      | 0.7381 | 0.4762 | 0.6429 | 0.9762 |
| SN48           | WI       | 7.2275 %            | 1.0000                      | 0.4991 | 0.2048 | 0.2365 | 0.5270 |
| SN49           | WY       | 0.4441 %            | 1.0000                      | 1.0000 | 0.8788 | 1.0000 | 0.4545 |
